# Supplementary material for: Relationship of T1, T2* durations and ADC values with tumor type and histopathological tumor degree in solid kidney tumors
Source: Research Square preprint supplement (doi:10.21203/rs.3.rs-6897348/v1), 2025-08-07
Supplement: Supplementary file 1 [file 01e099d68ffac0bfc1c90275.docx]

**Supplementary Material for Review**


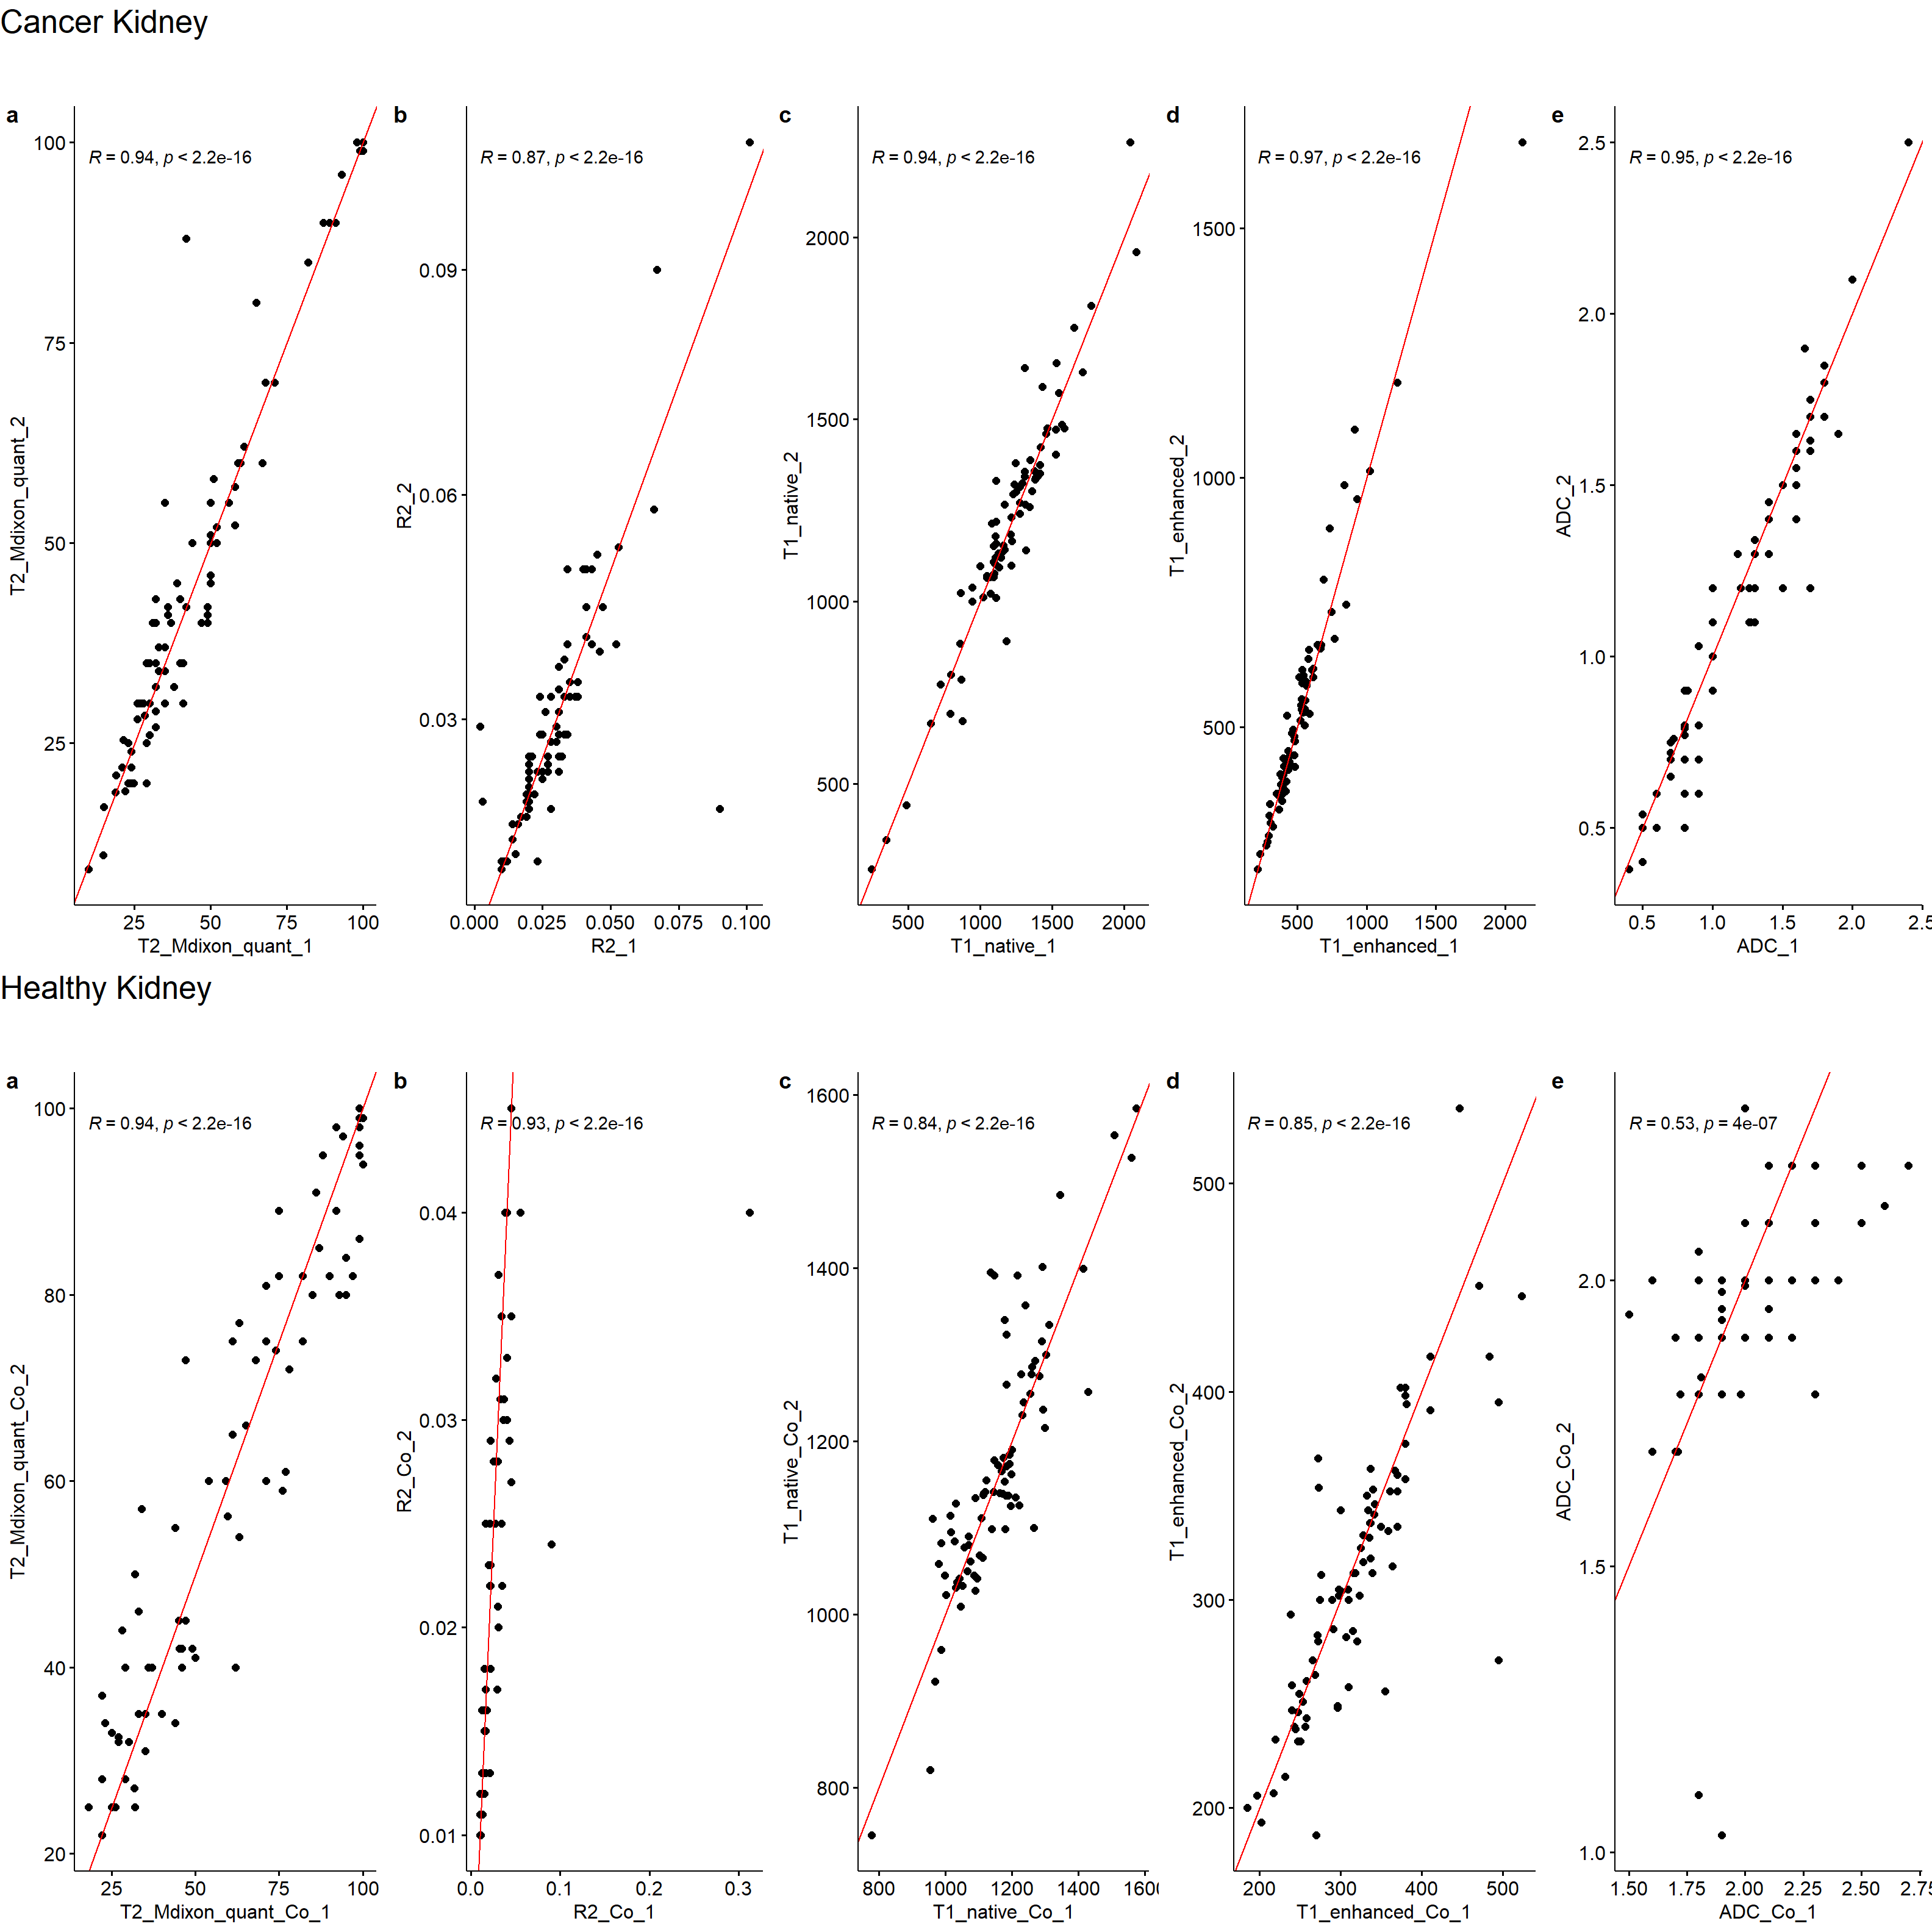


**Figure S1 -Interobserver agreement of kidney tumor measurements**: 1st observer's measurements are shown on the x-axis, 2nd observer's measurements are shown on the y-axis. T2 mDixon(a), R2*(b), T1 native(c), T1 enhanced(d) and ADC(e) values for kidney tumors were compared to assess the agreement between the 1st and 2nd observer.


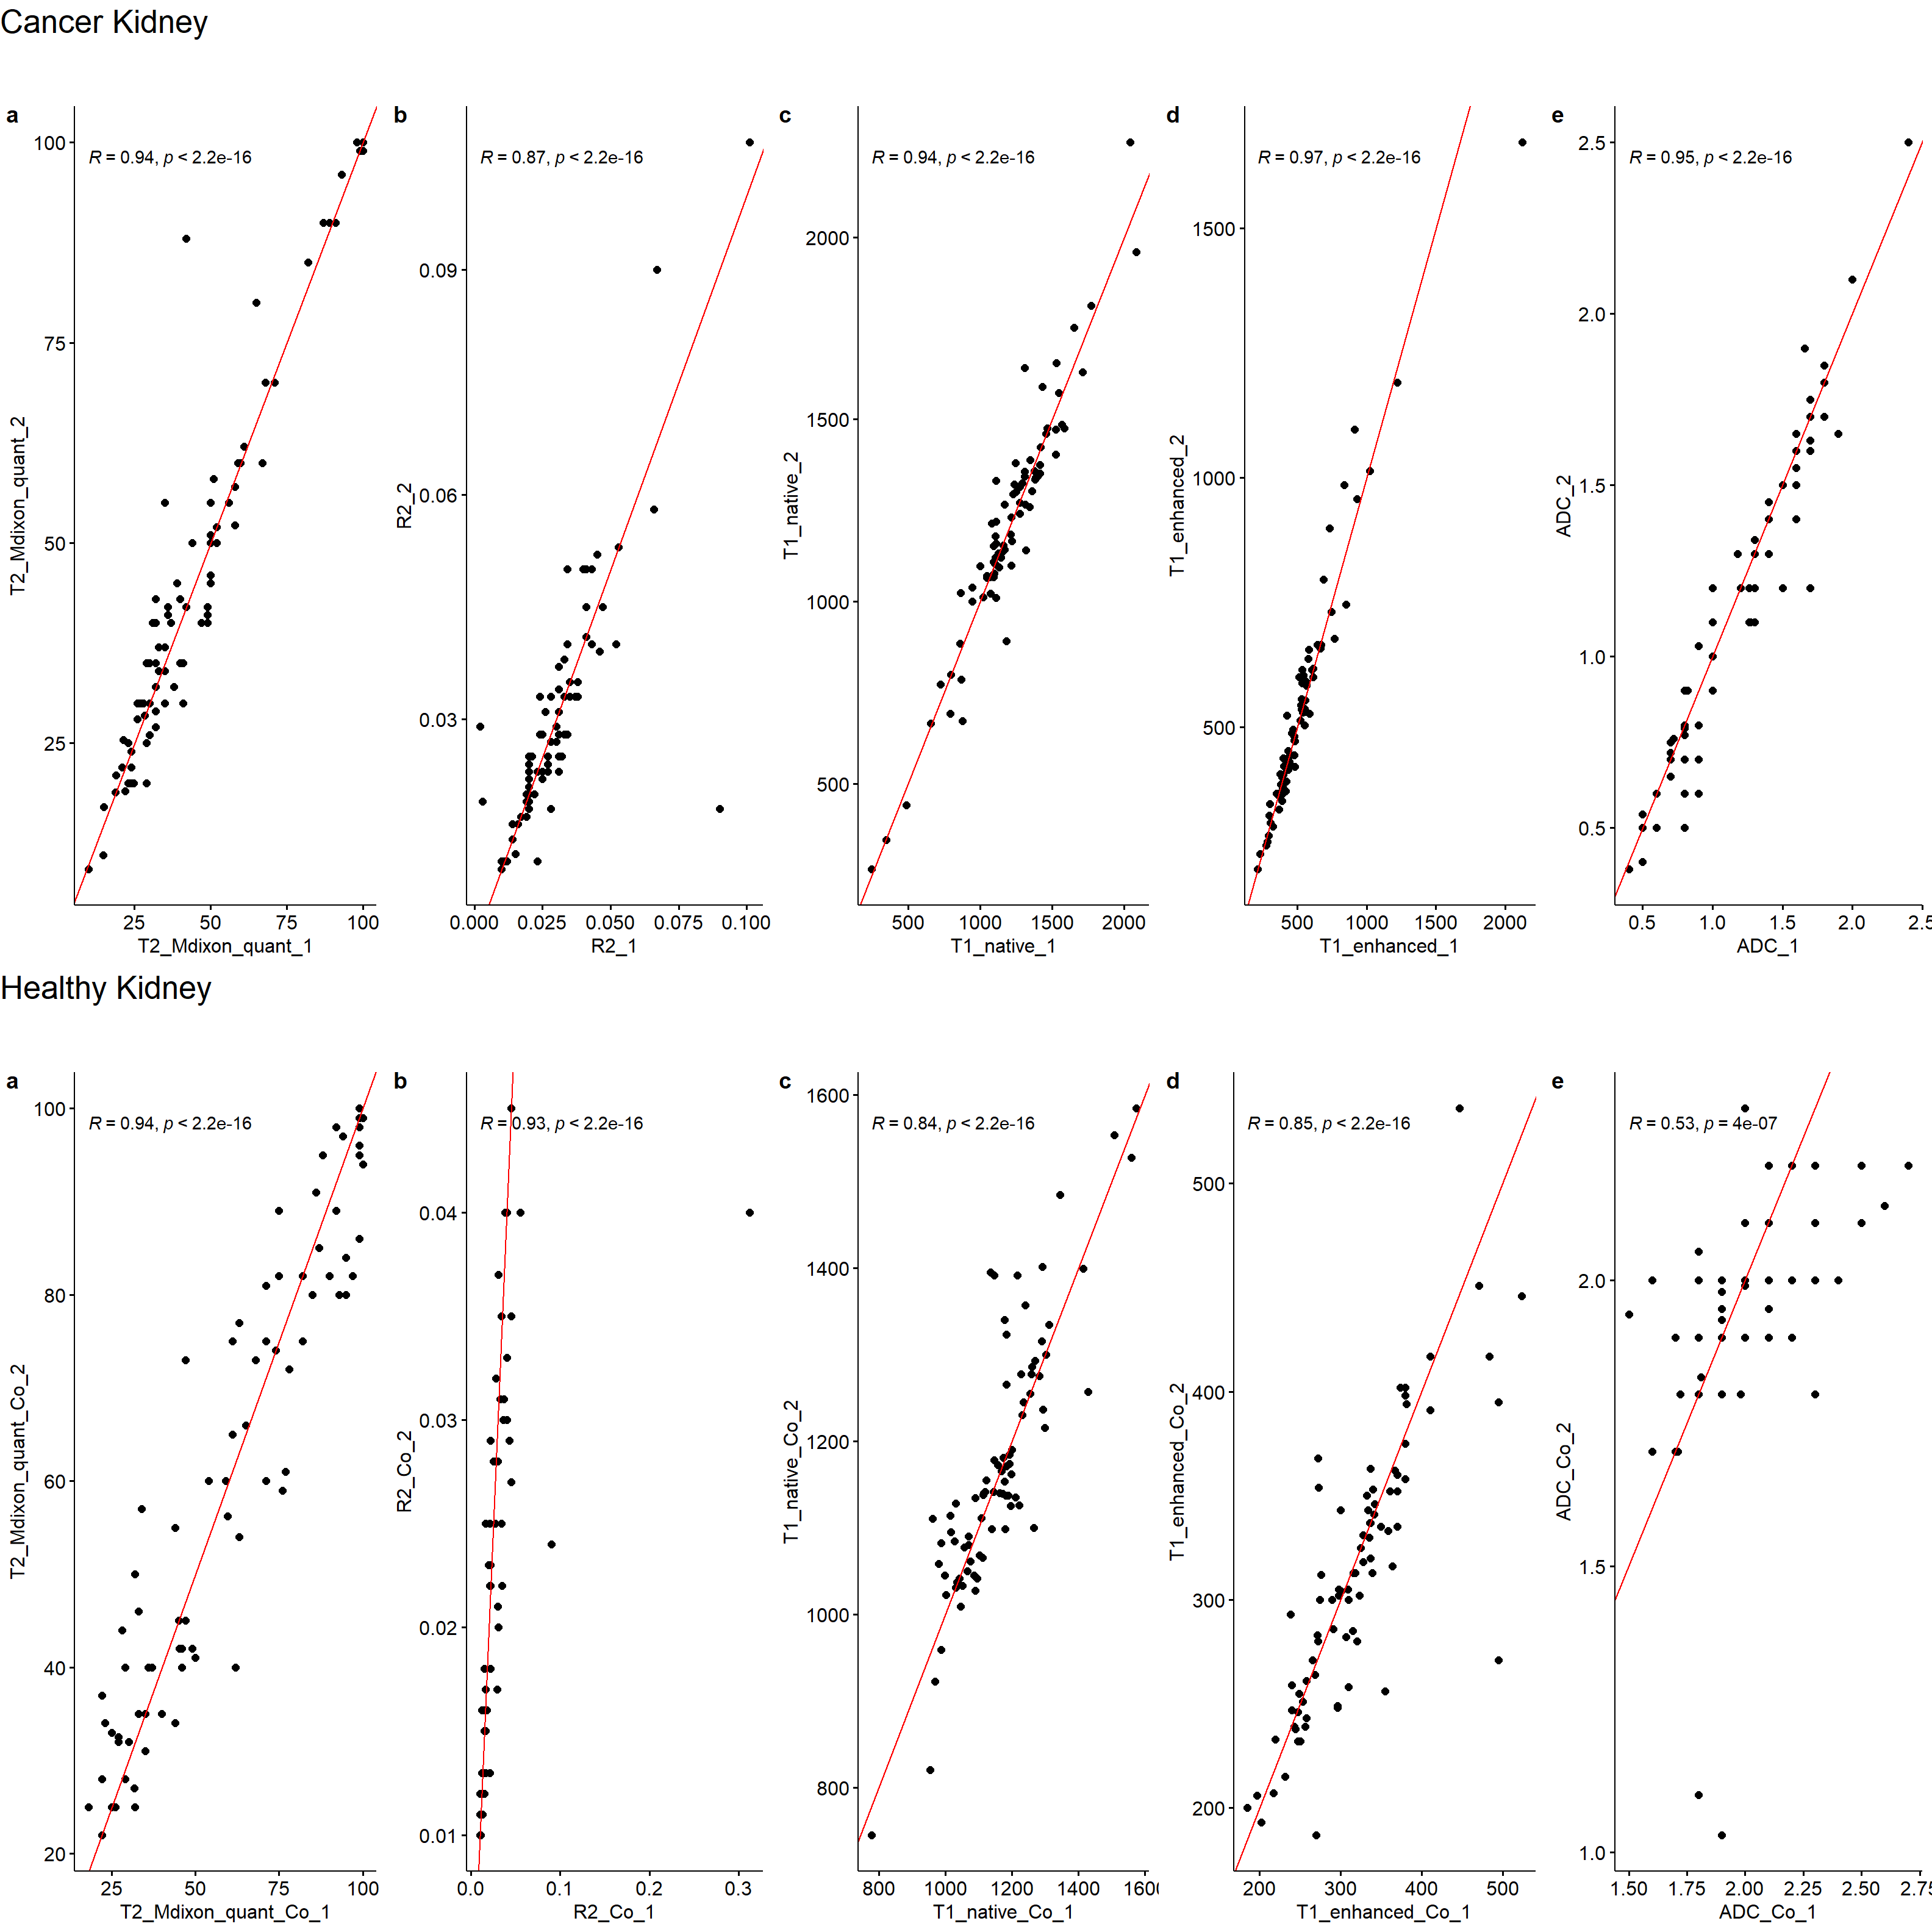


**Figure S2- Interobserver agreement of opposite kidney renal cortex measurements**: 1st observer's measurements are shown on the x-axis, 2nd observer's measurements are shown on the y-axis. T2 mDixon(a), R2*(b), T1 native(c), T1 enhanced(d) and ADC(e) values of the opposite kidney healthy cortex measurements were compared to evaluate the agreement between the 1st and 2nd observer.

|  | **Health Condition** | **Cancer** | **Healthy** | **Error Rate** | **Overall Accuracy** |
| --- | --- | --- | --- | --- | --- |
| **Test Data** | **Cancer** | 74 | 8 | 0.098 | 0.932 |
| **Healthy** | 3 | 79 | 0.037 |

**Table S1: Error rates of the data with test data which contains all of the samples from observer 2.**
